# Supplementary material for: A wide-frequency range dielectric tuning of BaTiO3by embedding metal nanocrystals
Source: Royal Society of Chemistry journal article supplement (doi:10.1039/d0ra09854j), 2021-01-01
Supplement: d0ra09854j1.pdf [file d0ra09854j1.pdf]

## Electronic supplementary information (ESI)

### Wide-frequency-range dielectric tuning of BaTiO<sub>3</sub> by embedding metal nanocrystals

Zhengwei Xiong<sup>1</sup>, Qian Liu<sup>1</sup>, Jinlong Tang<sup>1</sup>, Leiming Fang<sup>2</sup>, Xiaoqiang Zhang<sup>3</sup>, Jun  
Li<sup>4</sup>, Yajun Fu<sup>1</sup>, Jin Wang<sup>1</sup>, Zhipeng Gao<sup>1,4</sup>, Deli Shi<sup>1†</sup>

#### Affiliations:

<sup>1</sup>Joint Laboratory for Extreme Conditions Matter Properties, Southwest University of  
Science and Technology, Mianyang, 621010, China

<sup>2</sup>Institute of Physics Nuclear and Chemistry, China Academy of Engineering Physics,  
Mianyang, 621900, China

<sup>3</sup> Institute of Electronic Engineering, China Academy of Engineering Physics,  
Mianyang, Mianyang, 621900, China

<sup>4</sup>Institute of Fluid Physics, China Academy of Engineering Physics, Mianyang,  
621900, China

\*Corresponding author:

Deli Shi (deli.s@foxmail.com)

---

† Corresponding author. E-mail: 2801465754@qq.com

Electronic Supplementary Information (ESI) available: Electron energy loss spectroscopy of Fe-L<sub>3,2</sub> in the  
composite films.

We further provided the EELS of Fe- $L_{3,2}$  in the composite films (Fig. S1, Supplementary information). It can be seen that the position of the  $L_3$  and  $L_2$  edge from the area of Fe is 707.2 and 721.3 eV, respectively. It proves that the Fe element presents a metallic state in the composite films instead of iron oxides [1, 2].

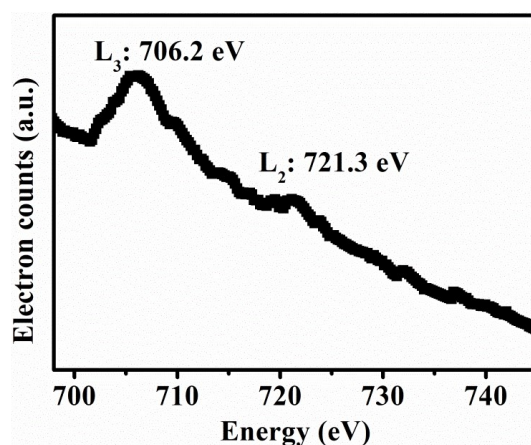

Fig. S1 Electron energy loss spectroscopy of Fe- $L_{3,2}$  in the composite films.

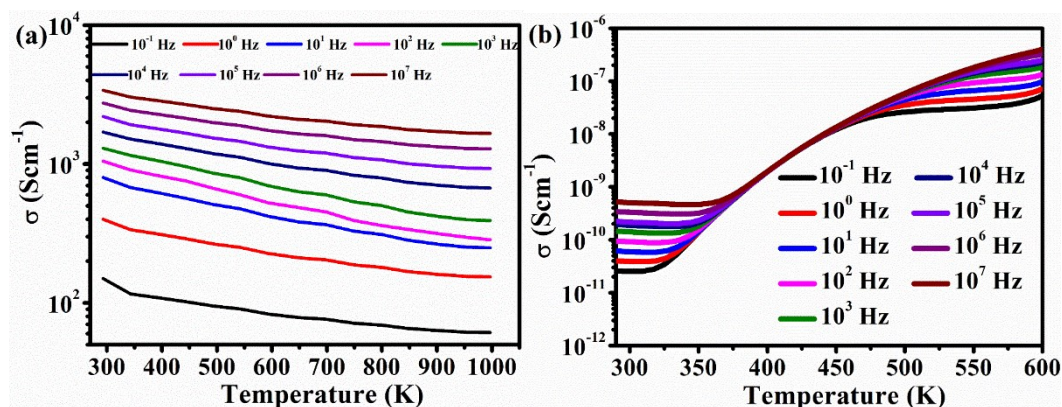

**Fig. S2(a)** Temperature dependence conductivity ( $\sigma$ ) of 0.5 wt% Nb:SrTiO<sub>3</sub> substrates and (b) pure epitaxial BTO films at varied frequencies.

Fig. S2 shows the temperature dependence conductivity ( $\sigma$ ) of 0.5 wt% Nb:SrTiO<sub>3</sub> substrates and epitaxial BTO films. With the increase of temperatures, the  $\sigma$  of

Nb:SrTiO<sub>3</sub> substrate is almost linearly decreased (Fig. S2a), ascribing that the Nb:SrTiO<sub>3</sub> behaves as a doped semiconductor with electrons being thermally activated. On the contrary, the  $\sigma$ - $T$  curves of BTO films present the insulating properties. So we can exclude the influence of 0.5 wt% Nb:SrTiO<sub>3</sub> substrates to the films. By comparison, the conductivities of Fe NCs-BTO composites (Figs. 6c, d) are higher than that of BTO films (Fig. S2b), proving that the embedded Fe NCs could really increase the  $\sigma$  of BTO matrix. The increased leakage conductance further brings the increase of  $\tan\delta$  (Fig. 4b). To sum up, it can be concluded that the embedded Fe NCs could indeed change the dielectric properties of epitaxial BTO films.

[1] J. Yuan, E. Gu, M. Gester, J. A. Bland, L. M. Brown, Electron-energy-loss spectroscopy of Fe thin films on GaAs (001), *J. Appl. Phys.*, 1994, **75**, 6501.

[2] K. F. Chen, S. C. Lo, L. Chang, *et al.*, Valence state map of iron oxide thin film obtained from electron spectroscopy imaging series, *Micron*, 2007, **38**, 354-361.
